# Supplementary material for: Distribution of the Indicator of the Appropriate Admission of Patients with Circulatory System Diseases to County Hospitals in Rural China: A Cross-Sectional Study
Source: MDPI journal article supplement (doi:10.3390/ijerph16091621), 2019-05-09
Supplement: s1 [file s1]

## Supplementary Materials

**Table S1.** AEP criteria for county hospitalisation.

| A.  | Requirement for services                                                                                                                                                                                                                                                                      |
|-----|-----------------------------------------------------------------------------------------------------------------------------------------------------------------------------------------------------------------------------------------------------------------------------------------------|
| 1.  | Need surgery or follow-up treatment within 24 hours: (1) local anesthesia or general anesthesia; and/or (2) instruments or other facilities that are only available for hospitalized patients (angiography, visceral biopsy) (Abbreviation: need surgery/follow-up treatment within 24 hours) |
| 2.  | Treatment with varying dosage or drug on a regular basis under direct medical supervision (Abbreviation: Varying dosage/drug under supervision)                                                                                                                                               |
| 3.  | Calculation of intake and output volume (Abbreviation: Calculate intake/output volume)                                                                                                                                                                                                        |
| 4.  | Operation to be conducted on the following day in the operating room, detailed pre-operative consultation or evaluation on the day of admission (Abbreviation: Operation on the following day)                                                                                                |
| 5.  | Main surgical incision and drainage nursing (Abbreviation: Surgical incision & drainage nursing)                                                                                                                                                                                              |
| 6.  | Quarantined patients                                                                                                                                                                                                                                                                          |
| 7.  | Bedside electrocardiogram (ECG) monitoring or testing vital signs at least every 2 hours (Abbreviation: ECG per 2 hours)                                                                                                                                                                      |
| 8.  | Stopping (at least once every 8 hours) or continuing oxygen inhalation (Abbreviation: Stopping/continuing oxygen inhalation)                                                                                                                                                                  |
| 9.  | Referral of post-operative recovery                                                                                                                                                                                                                                                           |
| B.  | Diseases severity                                                                                                                                                                                                                                                                             |
| 1.  | Continuous fever>38.0°C for more than 5 days (Abbreviation: fever>38.0°C & > 5 days)                                                                                                                                                                                                          |
| 2.  | Acute confusion (coma or adaphoria) (Abbreviation: Acute confusion)                                                                                                                                                                                                                           |
| 3.  | Severe anomaly in electrolyte or blood and vigor, showing the following situations: (1) Na<123 mEq/L or>156 mEq/L; (2) K<2.5 mEq/L or>6.0 mEq/L; (3) HCO <sub>3</sub> <20 mEq/L or>36 mEq/L; and (4) arterial blood pH<7.30 or>7.45 (Abbreviation: Severe in electrolyte / blood and vigor)   |
| 4.  | Loss of sight or hearing for 48 hours (Abbreviation: sight or hearing losing for 48 hours)                                                                                                                                                                                                    |
| 5.  | Loss of activity in any part of the body for 48 hours (Abbreviation: Partial Physical inactivity within 48 hours)                                                                                                                                                                             |
| 6.  | Excretion disorder or absence of intestinal peristalsis in the past 24 hours (Abbreviation: Abnormal excretion in the past 24 hours)                                                                                                                                                          |
| 7.  | Active bleeding                                                                                                                                                                                                                                                                               |
| 8.  | Needing blood transfusion because of bleeding (Abbreviation: Needing blood transfusion)                                                                                                                                                                                                       |
| 9.  | Mental disorders caused by non-alcohol dependence (Abbreviation: Non-alcohol mental disorders)                                                                                                                                                                                                |
| 10. | Viscera removal or surgical wound dehiscence (Abbreviation: Dehiscence of surgical wound)                                                                                                                                                                                                     |
| 11. | Pulse less than 50 times or greater than 140 times per minute (Abbreviation: Abnormal pulse)                                                                                                                                                                                                  |
| 12. | Abnormal blood pressure: systolic blood pressure<90 mmHg or>200 mmHg and/or diastolic blood pressure<60 mmHg or>120 mmHg (Abbreviation: Abnormal blood pressure)                                                                                                                              |

13. Ventricular fibrillation or acute myocardial ischemia shown by electrocardiogram (ECG) report or course log (Abbreviation: Ventricular fibrillation/acute myocardial ischemia)
  14. Acute blood disorder, severe medium-sized leukopenia, thrombocytopenia, leukocytosis, erythrocytosis, thrombocytosis or hemolysis-resulted symptoms (Abbreviation: Abnormal blood condition)
  15. Progressive acute neurological disorders
  16. Soft tissue injuries affecting basic self-care (Abbreviation: Soft tissue injuries)
  17. Acute myocardial infarction or cerebrovascular accident (stroke) (Abbreviation: Acute myocardial infarction/stroke)
  18. Spinal cord lesions
  19. Lung infection above 40% or leafy lesions according to X-ray examination (Abbreviation: Lung infection > 40% or leafy lesions)
  20. Hyperemesis or acute pain at acute attack by chronic diseases (Abbreviation: Acute episode symptoms of chronic diseases)
  21. Burns occurred in specific areas (Abbreviation: Burns)
-
